# 1 Thinking like a naturalist: enhancing computer vision of citizen science 2 images by harnessing contextual data

3 J. Christopher D. Terry<sup>1,2,\*</sup> 0000-0002-0626-9938

4 Helen E. Roy<sup>1</sup> 0000-0001-6050-679X

5 Tom A. August<sup>1</sup> 0000-0003-1116-3385

6 1: NERC Centre for Ecology & Hydrology, Crowmarsh Gifford, Maclean Building, Wallingford, OX10

7 8BB, UK

8 2: Department of Zoology, University of Oxford, Oxford, UK

9 \* Corresponding Author: [james.terry@zoo.ox.ac.uk](mailto:james.terry@zoo.ox.ac.uk)

10 Running head: *Contextual data in automated species ID*

## 11 **Abstract**

12 1. The accurate identification of species in images submitted by citizen scientists is currently a  
13 bottleneck for many data uses. Machine learning tools offer the potential to provide rapid,  
14 objective and scalable species identification for the benefit of many aspects of ecological  
15 science. Currently, most approaches only make use of image pixel data for classification.

16 However, an experienced naturalist would also use a wide variety of contextual information  
17 such as the location and date of recording.

18 2. Here, we examine the automated identification of ladybird (Coccinellidae) records from the  
19 British Isles submitted to the UK Ladybird Survey, a volunteer-led mass participation recording  
20 scheme. Each image is associated with metadata; a date, location and recorder ID, which can  
21 be cross-referenced with other data sources to determine local weather at the time of

22 recording, habitat types and the experience of the observer. We built multi-input neural  
23 network models that synthesise metadata and images to identify records to species level.  
24 3. We show that machine learning models can effectively harness contextual information to  
25 improve the interpretation of images. Against an image-only baseline of 48.2%, we observe a  
26 9.1 percentage-point improvement in top-1 accuracy with a multi-input model compared to  
27 only a 3.6% increase when using an ensemble of image and metadata models. This suggests  
28 that contextual data is being used to interpret an image, beyond just providing a prior  
29 expectation. We show that our neural network models appear to be utilising similar pieces of  
30 evidence as human naturalists to make identifications.  
31 4. Metadata is a key tool for human naturalists. We show it can also be harnessed by computer  
32 vision systems. Contextualisation offers considerable extra information, particularly for  
33 challenging species, even within small and relatively homogeneous areas such as the British  
34 Isles. Although complex relationships between disparate sources of information can be  
35 profitably interpreted by simple neural network architectures, there is likely considerable  
36 room for further progress. Contextualising images has the potential to lead to a step change in  
37 the accuracy of automated identification tools, with considerable benefits for large scale  
38 verification of submitted records.

39

40 **Key-words:** machine learning; computer vision; citizen science; ladybird; metadata; convolutional  
41 neural network; species identification

## 42 **Introduction**

43 Large-scale and accurate biodiversity monitoring is a cornerstone of understanding ecosystems and  
44 human impacts upon them (IPBES, 2019). Recent advances in artificial intelligence have revolutionised  
45 the outlook for automated tools to provide rapid, scalable, objective and accurate species  
46 identification and enumeration (Wäldchen & Mäder, 2018; Weinstein, 2018; Torney et al., 2019; Willi  
47 et al., 2019). Improved accuracy levels could revolutionise the capacity of biodiversity monitoring and

48 invasive species surveillance programs (August et al., 2015). Nonetheless, at present, general-purpose  
49 automated classification of animal species is currently some distance from the level of accuracy  
50 obtained by humans, and the potential remains underutilised.

51 The large data requirements and capacity of machine learning has led to a close association with  
52 citizen science projects (Wäldchen & Mäder, 2018), where volunteers contribute scientific data  
53 (Silvertown, 2009). Citizen scientists can accurately crowd-source identification of researcher-gathered  
54 images (e.g. Snapshot Serengeti; Swanson et al., 2015), generate records to be validated by experts  
55 (e.g. iRecord; Pocock, Roy, Preston, & Roy, 2015) or both simultaneously (e.g. iNaturalist;  
56 iNaturalist.org). However, there can be a considerable lag between record submission and human  
57 verification. If computer vision tools could generate more rapid, or even instantaneous, identifications  
58 it could assist with citizen scientist recruitment and retention. While image acquisition by researchers  
59 can be directly controlled and lead to high accuracies (Rzanny, Seeland, Wäldchen, & Mäder, 2017;  
60 Marques et al., 2018), images from citizen science projects are highly variable and pose considerable  
61 challenges for computer vision (Van Horn et al., 2017).

62 Most automatic species identification tools only make use of images (Weinstein 2018). However, an  
63 experienced naturalist would utilise a wide variety of contextual information when making an  
64 identification. This is particularly the case when distinguishing 'difficult' species, where background  
65 information about the record may be essential for a confident identification. In a machine learning  
66 context, this supplementary information about an image (metadata) can be split into two categories  
67 (Figure 1). Primary metadata is directly associated with a record such as GPS-coordinates, date of  
68 recording and the identity of the recorder. Derived (secondary) metadata is generated through cross-  
69 referencing with other sources of information to place this metadata into a more informative context  
70 (Tang, Paluri, Fei-Fei, Fergus, & Bourdev, 2015). In an ecological context, this may include weather  
71 records, maps of species distribution, climate or habitat, phenology records, recorder experience, or  
72 any other information source that could support an identification.

73

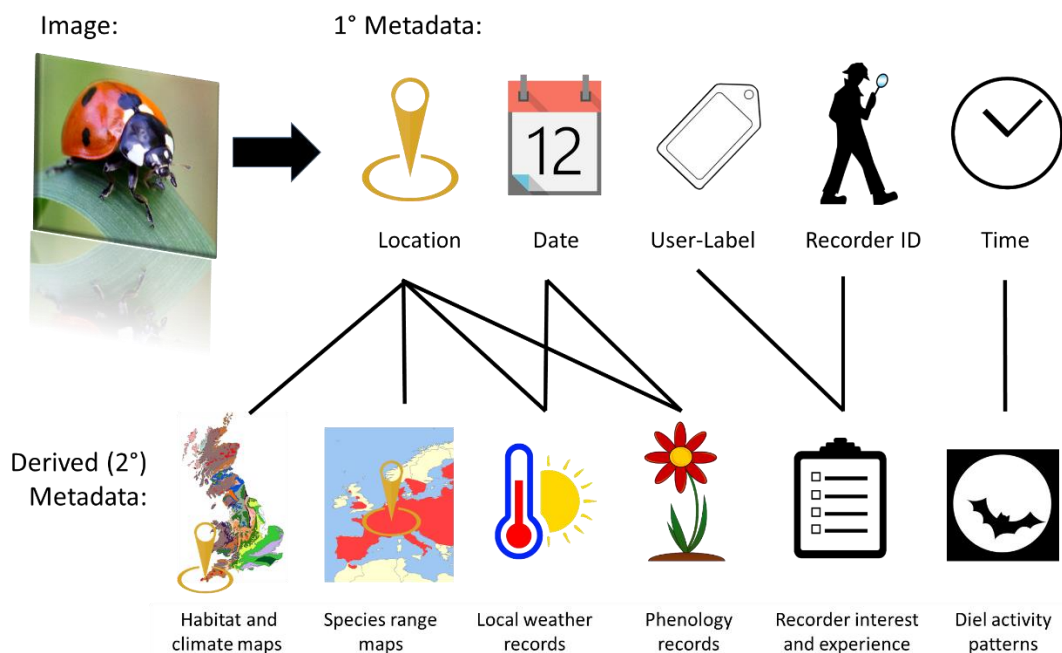

74

75 **Figure 1.** Relationships between categories of metadata. Primary metadata are basic attributes of the record  
76 directly associated with an image such as the date or location. By contrast, derived (or secondary) metadata  
77 requires cross-reference to external databases, which may include physical, ecological or social data. External  
78 sources of information may be fixed and stable (such as habitat maps) or dynamic and require updating in order  
79 to keep the model up to date (such as weather records or recorder experience).

80 Efforts to include contextual spatio-temporal information have largely focused on reducing the list of  
81 potential species that may be expected in a given area. iRecord ([www.brc.ac.uk/irecord](http://www.brc.ac.uk/irecord)) partially  
82 automates this process, flagging records to expert verifiers that are labelled as being outside of the  
83 known range. Distribution priors have been shown to be effective in improving the identification of  
84 North American birds (Berg et al., 2014), images in the iNaturalist dataset (Mac Aodha, Cole, & Perona,  
85 2019) and generating location-specific shortlists of German plants (Wittich, Seeland, Wäldchen,  
86 Rzanny, & Mäder, 2018). This approach can greatly reduce the risk of non-sensical identifications that  
87 otherwise lead to considerable scepticism over the use of automated methods (Gaston & O'Neill,  
88 2004). Nevertheless, this 'filtering' approach does not make full use the available data. Many species  
89 vary in appearance seasonally or across their range. For example, the proportion of the melanic form

90 of the 2-spot ladybird *Adalia bipunctata* varies greatly across the UK (Creed, 1966). To an expert  
91 naturalist, metadata can do more than shorten the list of potential identifications - it can help to  
92 interpret the image itself. For example, juveniles, flowers or breeding plumage may only be observed  
93 in narrow time windows or there may be geographic variation in colour patterns. Consequently,  
94 certain features within an image (e.g. spots on a butterfly's wing) may only aid in determining a  
95 species in specific regions, or times of year. It would only be worth looking for a particular pattern  
96 when that species and lifestage is active. Synthesising and making use of such disparate sets of  
97 information is challenging for humans even when detailed data is available, and such expertise  
98 requires many years to build. By contrast, neural networks are ideally suited to drawing together  
99 diverse sources in such a way to gain the maximal amount of information.

100 Ladybirds (Coleoptera: Coccinellidae) are a charismatic insect family that garner substantial public  
101 interest, with large numbers of submitted records to citizen science monitoring schemes around the  
102 world (Gardiner et al., 2012). Identification of ladybirds is challenging for both human (Jouveau,  
103 Delaunay, Vignes-Lebbe, & Nattier, 2018) and artificial intelligence (Van Horn et al., 2017) because of a  
104 number of morphological features. Many species of ladybird have polymorphic elytral colour patterns,  
105 with some species seemingly mimicking others, and so are principally disambiguated by size. However,  
106 size is extremely challenging for artificial intelligence to automatically infer from a single image  
107 without standardised scales (Laina, Rupprecht, Belagiannis, Tombari, & Navab, 2016). As an example  
108 the invasive Harlequin ladybird *Harmonia axyridis* (which has been a particular focus for research, Roy  
109 et al., 2016), is a polymorphic species and can resemble a number of other species. Consequently, the  
110 Harlequin ladybird is frequently misidentified by citizen scientists (Gardiner et al., 2012) but can be  
111 distinguished on the basis of its large size. Currently, submissions to the UK Ladybird Survey  
112 ([www.ladybird-survey.org](http://www.ladybird-survey.org)) are managed by a small number of expert verifiers, imposing a large  
113 burden on the expert community. There is growing interest in expanding the geographic scope of the  
114 survey with the recent launch of a smartphone app for recording ladybirds across Europe  
115 (<https://european-ladybirds.brc.ac.uk/>). The UK ladybird survey (and associated European extension)

116 therefore represents an example of a programme where a reliable automated identification tool could  
117 help to increase the use of citizen science to document biodiversity across the globe.

118 Classification tools that only use image data are not making maximal use of the information available  
119 to human experts. Here we demonstrate methods to incorporate metadata directly within neural  
120 networks used for the classification of images of ladybirds submitted to the UK Ladybird Survey. We  
121 examine if metadata can significantly improve classification accuracy, thereby increasing their  
122 potential to assist in large-scale biodiversity monitoring, by:

123 1. Comparing the classification accuracy of classifiers incorporating metadata compared to image-only  
124 classifiers.

125 2. Exploring whether neural networks make use of the same pieces of metadata information that a  
126 human experts do.

## 127 **Methods**

### 128 *Data*

129 Records of ladybirds (Coccinellidae) were sourced from the UK Biological Records Centre  
130 ([www.brc.ac.uk](http://www.brc.ac.uk)). These were filtered to include only those from within the British Isles, from 2013 to  
131 2018 inclusive, that contained an image and had been verified by an expert assessor. Records were  
132 distributed across the whole of the British Isles, although records were more frequent near more-  
133 heavily populated areas (Figure S1). The date range was selected based on a notable increase in  
134 records from 2013 with the release of a mobile app (iRecord Ladybirds). Identifications of records by  
135 expert verifiers was based on uploaded images and associated information including the species  
136 determination of the original observer, location, date, associated comments and (where known) the  
137 degree of skill of the recorder.

138 Of the 47 species of ladybird that had been recorded at least once in the UK (Duff, 2018), only 18  
139 species (listed in table 1) had at least 170 usable records, which we took as our lower cut-off to ensure

140 each species was represented by at least 120 unique training images. We judged that fewer training  
141 images would not result in accurate classification. These 18 species made up 97% of the total ladybird  
142 records during 2013-2018. Even after removing species with fewer than 170 usable records, the data  
143 set is highly imbalanced (Table 1), with two species making up the bulk of records: 7-spot ladybird  
144 *Coccinella septempunctata* (25.8%) and the highly polymorphic Harlequin ladybird (44.5%).

#### 145 *Images*

146 Records were manually scanned to remove the majority of images predominantly of eggs, larvae or  
147 pupae, 'contextual' images of habitat area, images including multiple species, and images that had  
148 been uploaded repeatedly. Larval and pupal images were overwhelming dominated by the highly  
149 distinctive Harlequin ladybird larvae or pupae (78%). Where a single record had multiple associated  
150 images, only the first was used. Images were centre cropped to square and then rescaled to 299x299  
151 pixels. Example images for each species are shown in Figure 2. After all data cleaning steps, the  
152 dataset had 39,877 records in total.

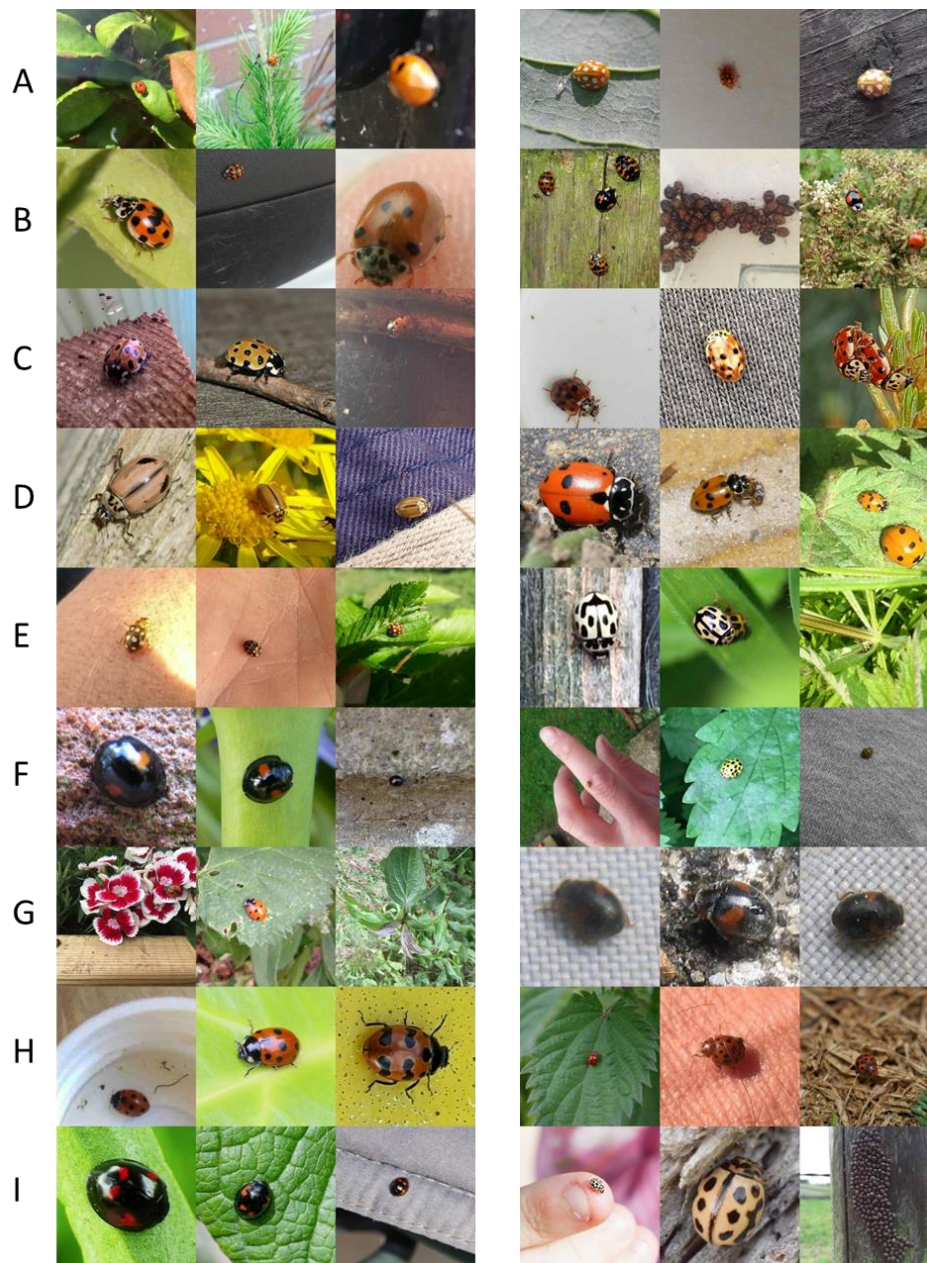

153

154 **Figure 2.** Three randomly selected images from each of the 18 ladybird species in our dataset, demonstrating the  
155 wide variety of poses, sizes and backgrounds. Images have been centre cropped to square and resized to  
156 299x299. Species are listed alphabetically: Left column: a) *Adalia bipunctata*, b) *Adalia decempunctata*, c) *Anatis*  
157 *ocellata*, d) *Aphidecta obliterata*, e) *Calvia quattuordecimguttata*, f) *Chilocorus renipustulatus*, g) *Coccinella*  
158 *septempunctata*, h) *Coccinella undecimpunctata*, i) *Exochomus quadripustulatus*. Right column: a) *Halyzia*  
159 *sedecimguttata*, b) *Harmonia axyridis*, c) *Harmonia quadripunctata*, d) *Hippodamia variegata*, e) *Propylea*  
160 *quattordecimpunctata*, f) *Psyllobora vigintiduopunctata*, g) *Scymnus interruptus*, h) *Subcoccinella*  
161 *vigintiquattropunctata*, i) *Tytthaspis sedecimpunctata*.



162 *Metadata*

163 We constructed models that made use of different subsets of the available metadata. The first (the  
164 primary metadata model) took only three pieces of primary metadata, drawn directly from the UK  
165 Ladybird Survey dataset: longitude, latitude and date. We represented date by day-of-year, excluding  
166 year values since information on 'year' would not be transferable to future records. The second model  
167 (the derived metadata model) supplemented the primary metadata with secondary metadata: data  
168 generated with additional reference to external sources of information, namely weather records,  
169 habitat and recorder expertise. We did not use the original citizen scientist species determination in  
170 our models, since it was too powerful compared to other sources of information (correct over 92% of  
171 the time) and did not align with the goal of fully automated identification.

172 Temperature records were accessed from the Midas database (Met Office, 2012), selecting data from  
173 the 88 UK stations with fewer than 20 missing records (2013 to 2018). Occasional missing values were  
174 imputed with a polynomial spline. Using the closest weather station to the record, maximum daily  
175 temperature for each day in the 14 preceding days ( $d-1:d-15$ ) and weekly average maximum daily  
176 temperatures for each of the 8 weeks preceding the high resolution period ( $d-16:d-71$ ) were accessed.

177 Local habitat information was derived from a 1km resolution land cover map (Rowland et al., 2017).

178 This provides percentages in each 1km grid of 21 target habitat classes (e.g. 'urban', 'coniferous  
179 woodland', 'heather', etc.). Where no data was available, each habitat was assumed to be 0.

180 We calculated a 'recorder experience' variable as the cumulative count of records submitted by that  
181 recorder at the time of each record. Only records of ladybirds in our dataset were included in this  
182 count. Where no unique recorder ID was available, that record was assumed to be a first record.

183 This led to a one-dimensional metadata vector of length 47 (day-of-year, latitude, longitude, 14 daily  
184 maximum temperature records, 8 weekly average temperature records, 21 habitat frequencies and  
185 recorder experience) associated with each image.

186 *Machine learning model architecture*

187 We built and fit convolutional neural network models (Goodfellow, Bengio, & Courville, 2016) in R  
188 3.5.3 using the functional model framework of the *keras* package (Allaire & Chollet, 2019). We used  
189 the TensorFlow backend on a Nvidia GTX 1080 Ti GPU. R code used to train the models is available at  
190 [github.com/jcdterry/LadybirdID\\_Public](https://github.com/jcdterry/LadybirdID_Public) and the core model architecture code is summarised in SI. We  
191 first constructed and trained image-only and metadata-only models. Once these had separately  
192 attained maximum performance, these were then combined to form the core of a multi-input model  
193 that takes both an image and metadata as input variables. For all models we conducted extensive  
194 hyperparameter searches to determine model architecture, extent of data-augmentation,  
195 regularisation parameters, learning rates and training times.

196 A schematic of the model architectures is shown in Figure 3. The metadata models were built with a  
197 simple architecture of two densely connected layers and a softmax classifier layer. For the image-  
198 model, the Inception-ResNet-v2 architecture (Szegedy, Ioffe, Vanhoucke, & Alemi, 2016) was used as  
199 an initial feature extractor. This is a very deep architecture that had been pretrained on the large  
200 imageNet dataset to extract meaningful features from a generic set of images. This transfer learning  
201 approach greatly expedites the training process and has previously achieved high accuracy in tests on  
202 the iNaturalist data set of citizen science records (e.g. Cui, Song, Sun, Howard, & Belongie, 2018) and  
203 for the identification of insects (Martineau et al 2018). To repurpose the model, we replaced the  
204 imageNet classification layer with new layers and trained the model on our dataset. The combined  
205 model was built by removing the classifier layers from the metadata and image models, concatenating  
206 the two outputs, and adding further layers. This fusion approach has been successfully used in the  
207 categorisation of satellite data (Minetto & Segundo 2019).

208

209

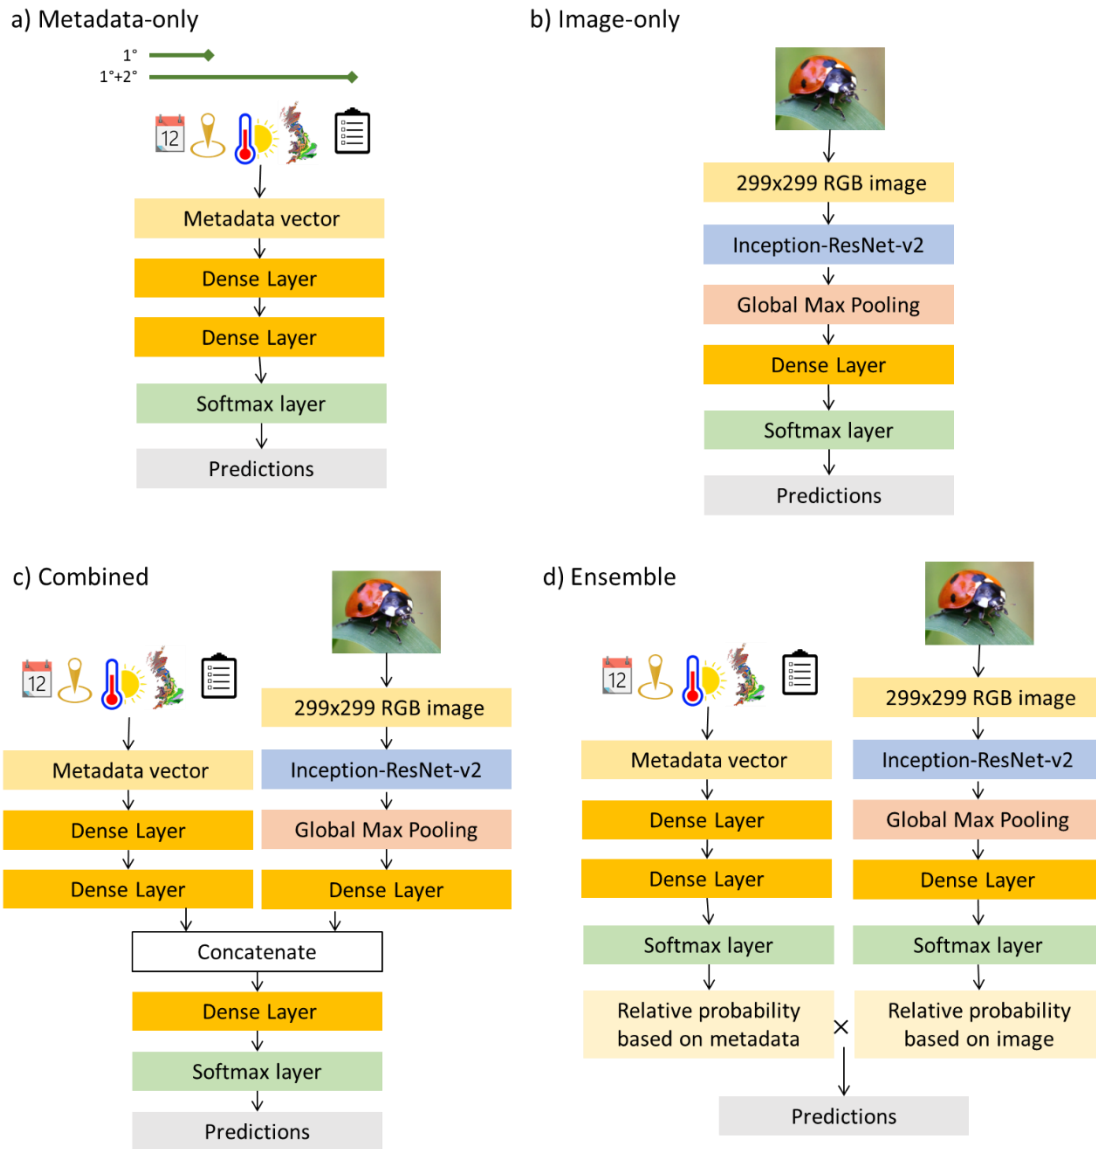

210

211

212

213

214

215

216

217

218

219

**Figure 3.** Outline schematic of the difference in model architectures. Dense layers are the principle component of neural networks, that fit linkages between every input and output node. All our dense layers incorporated a rectified linear unit (ReLU) non-linear activation function. Inception-ResNet-v2 is a very deep feature extraction model incorporating many convolutional layers and originally trained to classify a diverse set of objects, that we refined by retraining on our ladybird dataset. The global max pooling stage summarises the outputs of the image feature extractor for further computation by dense layers. Softmax layers output a vector that sums to one, which can be interpreted as probabilities of each potential category. Dropout, noise, batch normalisation and

220 other regularisation features enacted only during training time are not shown here for simplicity. R code to build  
221 models using the *keras* R package (Allaire & Chollet, 2019) is given in SI, which also details further  
222 hyperparameters such as the size of the each layer.

### 223 *Model Training*

224 Species records in the UK Ladybird Survey, like most biological record datasets (Van Horn et al., 2017),  
225 are highly skewed towards certain common species (Table 1). As predictive models are not perfect,  
226 such class-imbalanced data leads to critical choices about how to best assess ‘accuracy’. Overall  
227 accuracy may be maximised by rarely or never assigning species to unusual categories. A citizen  
228 scientist may prefer the maximum accuracy for the species in front of them (which is likely to be a  
229 commonly reported species). However, in an ecological science context, rare (or more precisely, rarely  
230 reported) species are often of particular interest to researchers managing citizen science projects.

231 The total dataset was randomly partitioned into training (70%), validation (15%) and test (15%) sets.  
232 To address the class-imbalance, we followed the approach suggested by Buda, Maki, & Mazurowski,  
233 (2018) and re-balanced our training set through up-sampling and down-sampling the available  
234 records. We did this so that each species had 2000 effective training records. Consequently, our  
235 underlying models did not have direct access to the information that, all else being equal, certain  
236 species are far more likely than others. This reduces the potential for the model ‘cheating’ during  
237 training by fixating on common species and ignoring rare species. To demonstrate the potential to  
238 improve overall accuracy by taking into account the relative frequency of each species, we tested  
239 weighted versions of each of the models. In these, the relative probability assigned to each species  
240 from each unweighted model ( $P_i$ ) were scaled by the relative frequency of each of the species ( $F_i$ ) in  
241 the training data as:  $P_{weighted_i} \propto P_i F_i$ .

242 To reduce overfitting, we made extensive use of image augmentation, weight regularisation, batch  
243 normalisation, dropout layers during training and introduced Gaussian noise on the metadata vector.  
244 Training optimisation was based on a categorical cross-entropy loss function using the ‘Adam’

245 adaptive moment estimation optimiser (Kingma & Ba, 2014). During training, if validation loss had  
246 reached a plateau, learning rate was reduced automatically. Training was stopped (and the best model  
247 restored) if there had been no further improvement in validation loss over at least four epochs.

248 After fitting the derived metadata, image-only and combined models, a simple ensemble model taking  
249 a weighted average of the derived metadata and image-only model predictions was also constructed  
250 and tested. This could be considered equivalent to using the metadata to construct a prior expectation  
251 for the predictions of the image model:

$$252 \quad P_{ensemble_i} \propto (1 - \omega)P_{image_i} + \omega P_{meta_i}$$

253 where the weighting ( $\omega$ ) between the metadata and image model probabilities was determined by  
254 optimising the ensemble model top-1 accuracy on the validation set.

### 255 *Model Testing and Evaluation*

256 Overall and species-level model performance was assessed in terms of top-1 (was the true ID rated  
257 most likely) and top-3 (was the true ID amongst the three options rated most highly) accuracy.

258 Because model accuracy will be dependent on the split of data into testing and training sets, and  
259 because model optimisation is a non-deterministic process, we repeated the entire model fitting  
260 process 5 times. For each repeat, assignment of images to training, validation and test sets was  
261 randomised.

### 262 *Role of Metadata Components*

263 To examine the dependence of the model on each aspect of the metadata we examined the decline in  
264 top-3 accuracy for each species when elements of metadata were randomised by reshuffling sets of  
265 values within the test set. We did this separately for the spatial coordinates, day-of-year,  
266 temperatures data, habitats data and recorder expertise.

## 267 **Results**

268 Across each of our training-test split realisations, combined multi-input models showed a marked and

269 consistent improvement on both the image-only (+ 9.1 percentage points) and the ensemble models  
 270 (+ 3.6 percentage points) (Figure 4). Species-level accuracies (averaged across the 5 split realisations)  
 271 for each of the models are reported in Table 1. There was no correlation between the species-specific  
 272 accuracy of the metadata-only model and the image-only model (Spearman’s rank correlation test  $\rho$   
 273 =0.23,  $p=0.34$ ). There was, however, a strong correlation at a per-species level between the fraction  
 274 correctly identified by the original citizen-scientist recorder and the combined model ( $\rho = 0.65$ ,  $p =$   
 275 0.003).  
 276

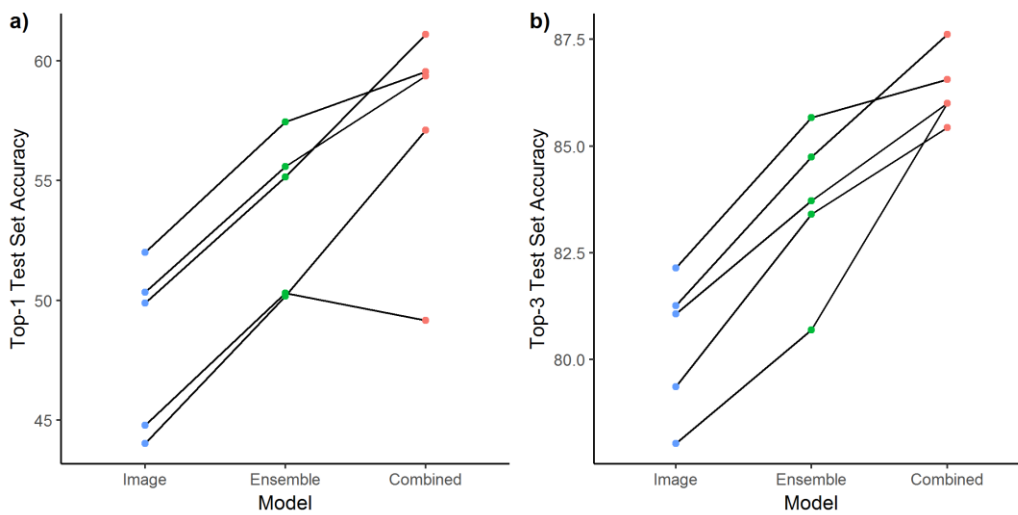

277  
 278 **Figure 4.** Consistent improvement in top-1 (a) and top-3 (b) accuracy from image only models to models with the  
 279 incorporation of metadata. An image-only model can be improved by ensembling with a metadata model, but  
 280 further improvements can be gained from fitting combined multi-input models. Lines show 5 suites of models  
 281 trained on a different train-validation-test randomisations.

| Species                            | Relative Frequency | Citizen Scientist | Metadata Only |         | Image Only | Image and Metadata |          |
|------------------------------------|--------------------|-------------------|---------------|---------|------------|--------------------|----------|
|                                    |                    |                   | Primary       | Derived |            | Combined           | Ensemble |
| <b>Overall</b>                     |                    | 92.4              | 15.9          | 22.4    | 48.2       | 57.3               | 53.7     |
| <i>Adalia bipunctata</i>           | 5.3                | 97.3              | 10.9          | 22.5    | 56.4       | 58.9               | 58.5     |
| <i>Adalia decempunctata</i>        | 2.9                | 85.8              | 1.9           | 2.2     | 24.6       | 22.9               | 23.3     |
| <i>Anatis ocellata</i>             | 0.5                | 94.5              | 2.7           | 15.3    | 37.3       | 41.3               | 42.0     |
| <i>Aphidecta oblitterata</i>       | 0.7                | 96.5              | 63.2          | 55.3    | 71.6       | 80.0               | 81.6     |
| <i>Calvia quattuordecimguttata</i> | 1.8                | 92.5              | 0.2           | 3.4     | 70.0       | 55.8               | 69.8     |
| <i>Chilocorus renipustulatus</i>   | 1.2                | 93.2              | 3.1           | 16.9    | 47.6       | 47.0               | 49.6     |

|                                              |      |      |      |      |      |      |      |
|----------------------------------------------|------|------|------|------|------|------|------|
| <i>Coccinella septempunctata</i>             | 26.1 | 95.5 | 0.0  | 0.3  | 64.8 | 64.2 | 62.9 |
| <i>Coccinella undecimpunctata</i>            | 0.7  | 94.0 | 5.1  | 27.2 | 58.5 | 58.5 | 62.1 |
| <i>Exochomus quadripustulatus</i>            | 1.5  | 92.0 | 15.2 | 26.9 | 37.9 | 43.9 | 40.0 |
| <i>Halyzia sedecimguttata</i>                | 3.7  | 93.9 | 0.8  | 7.7  | 65.6 | 73.5 | 66.1 |
| <i>Harmonia axyridis</i>                     | 44.1 | 89.6 | 27.9 | 38.6 | 34.7 | 53.6 | 47.1 |
| <i>Harmonia quadripunctata</i>               | 0.4  | 94.3 | 6.2  | 12.3 | 37.7 | 43.1 | 39.2 |
| <i>Hippodamia variegata</i>                  | 0.6  | 93.2 | 35.4 | 32.0 | 28.0 | 46.9 | 38.9 |
| <i>Propylea quattuordecimpunctata</i>        | 4.5  | 94.8 | 28.1 | 22.3 | 58.6 | 62.7 | 59.3 |
| <i>Psyllobora vigintiduopunctata</i>         | 3.0  | 98.5 | 5.2  | 11.8 | 56.3 | 58.5 | 58.1 |
| <i>Scymnus interruptus</i>                   | 0.4  | 98.2 | 93.6 | 76.0 | 88.0 | 89.6 | 90.4 |
| <i>Subcoccinella vigintiquatuor punctata</i> | 1.6  | 96.2 | 6.2  | 17.8 | 62.6 | 67.3 | 64.5 |
| <i>Tytthaspis sedecimpunctata</i>            | 1.0  | 91.2 | 7.0  | 21.9 | 43.5 | 51.1 | 50.8 |

282 **Table 1.** Average per-species top-1 accuracy across the suite of models. Citizen scientist accuracy is determined

283 by frequency by which the label assigned by the recorder corresponds to the verified species name. Equivalent

284 tables for top-3 accuracy and for accuracy including a prior weighting based on relative frequency are given in SI.

285 The overall accuracy of all models could be greatly improved by weighting the output probabilities by

286 the prior expectation given the relative frequency of each species. For example, the average top-1

287 accuracy of the combined model rises from 57% to 69%. However, these gains are made at the cost of

288 very infrequently identifying unusual species correctly. With a weighted model the two most

289 commonly observed species, Harlequin and Seven-spot ladybirds, are correctly identified 90% and 89%

290 of the time respectively. However, 12 infrequently observed species are correctly identified in less

291 than 12% of cases.

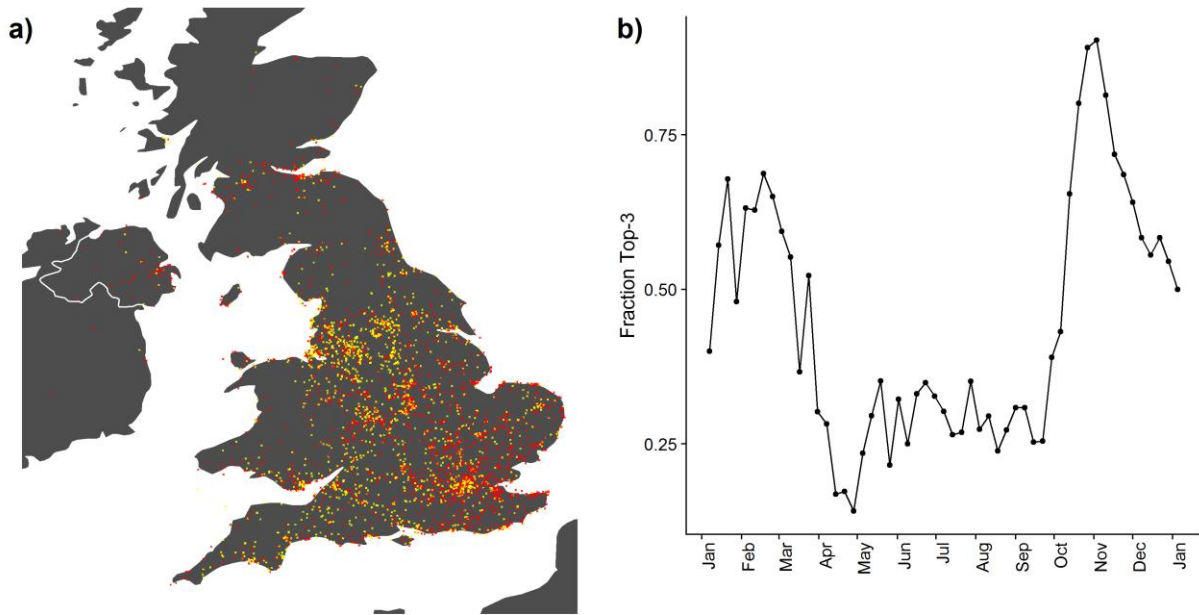

292

293 **Figure 5.** Distribution of records accurately (top-3) predicted solely from a derived metadata model. a) Spatial  
294 distribution of accuracy, showing decreased accuracy in the south-east. Accurate predictions are shown in  
295 yellow, incorrect in red, b) Weekly fraction of accurate metadata identifications through the year showing strong  
296 seasonal variation in accuracy with a particular peak in mid-autumn.

297 The derived metadata model had an overall top-3 accuracy of 43.7% and was making at least some use  
298 of all the components of the metadata since randomising each group caused a decline in accuracy.  
299 Accuracy of the metadata-only model peaked spatially away from the south-east of the British Isles  
300 and outside of summer (Figure 5). Metadata accuracy (43.7%) was most related to temperature. This is  
301 demonstrated by a 10% percentage point decrease in accuracy when temperature was removed.  
302 Where both temperature and day-of-year data was available, the temperature data appears to be  
303 used more (10% and 0.2% decreases respectively). It is not possible to determine whether this is  
304 because temperature is simply more relevant to ladybirds than date, or whether this is an artefact of  
305 the different lengths of the metadata vectors. When day-of-year was randomised in the primary  
306 metadata model, top-3 accuracy declines by 4.5% points. Within temperature, the model appeared to  
307 be making more use of the weekly temperature data (2-10 weeks before the record), where  
308 randomisation caused an 8.1% decrease than the more proximate daily records for the preceding  
309 fortnight (-5.4%). The remaining metadata components had smaller influences on overall top-3



310 accuracy: randomising habitat data led to a 2.8% decrease while randomising recorder experience led  
311 to a 2.1% decrease.

312 These overall results are highly influenced by the dominant species (particularly the Harlequin  
313 ladybird) in the test set, masking variation in decline in accuracy on a per-species level (SI Table S2).  
314 The apparent importance of each metadata component appears to align with ecological expectations.  
315 The five species with greatest decline in accuracy when habitat is randomised are all considered  
316 habitat specialists (Roy & Brown, 2018): *Coccinella undecimpunctata* (dunes), *Anatis ocellata*  
317 (conifers), *Tytthaspis sedecimpunctata* (grassland and dunes), *Subcoccinella vigintiquatuorpunctata*  
318 (grassland), and *Aphidecta oblitterata* (conifers). Similarly, the randomisation of location had the  
319 greatest effect on the localised species (Figure S1). The top three most affected were: *Aphidecta*  
320 *oblitterata* (frequently reported in Scotland), *Scymnus interruptus* (South-East England) and *Coccinella*  
321 *undecimpunctata* (coastal). By contrast, the Seven-Spot ladybird, a widespread and generalist species  
322 was poorly identified by the metadata model and showed a minimal response to randomisation. The  
323 species affected most by the randomisation of temperature was *Propylea quattuordecimpunctata*,  
324 with the common name of the ‘dormouse’ ladybird (Roy and Brown 2018, p.112) because of its known  
325 late emergence.

326 The randomisation of recorder experience had the greatest impact on *Scymnus interruptus*. This was  
327 the only ‘inconspicuous’ ladybird in our dataset, which inexperienced recorders may not even realise is  
328 a ladybird (see Figure 2g). There was also a 10% decrease in the identification of Harlequin ladybirds  
329 when recorder experience was randomised. Novice recorders are notably more likely to record  
330 Harlequin ladybirds than more experienced recorders. The first record submitted by a new recorder is  
331 a Harlequin ladybird 57.4% of the time, which rapidly declines to 38% by the 10<sup>th</sup>.

## 332 **Discussion**

333 The use of metadata within computer vision models considerably improves their reliability for species  
334 identification. This exciting finding has implications for biological recording, demonstrating the

335 potential to use innovative approaches to assist in processing large occurrence datasets accrued  
336 through mass participation citizen science. Basic primary metadata is straightforward to incorporate  
337 within machine learning models and, since this information is already collected alongside the  
338 biological records, can be widely adopted.

### 339 *Interpretation of results*

340 The notable gain in accuracy of the combined multi-input model compared to the ensemble model is  
341 consistent with the model learning to interpret the image based on the metadata. This is evidence that  
342 metadata can provide further gains beyond simply filtering the potential species list (Wittich et al.,  
343 2018). While it is not possible to determine exactly what interpretations the artificial intelligence is  
344 making, we can discern plausible scenarios. In autumn, ladybirds select suitable overwintering sites  
345 and enter dormancy through the adverse months (Roy & Brown, 2018). Each species exhibits a specific  
346 preference in overwintering habitat. Harlequin ladybirds favour buildings, leading to a high proportion  
347 of submitted records from inside homes of Harlequin ladybirds in the autumn as they move inside to  
348 overwinter (Roy et al., 2016). Submitted images of ladybirds exhibiting this behaviour are often poor-  
349 quality showing ladybirds at a distance nestled in crevices (Figure 2). The high accuracy of the  
350 metadata model during autumn suggests it has learnt (as expert human verifiers have) that a poor-  
351 quality image with a pale background during the autumn is very likely a Harlequin ladybird.

352 Our results likely represent a lower bound on the potential improvements that can be leveraged from  
353 metadata for identifying challenging species. Although British ladybirds have distinct ranges, activity  
354 periods and habitat (Comont et al., 2012; Roy & Brown, 2018) many are relatively cosmopolitan and  
355 can be observed as adults for large parts of the year. Classification models where focal species are  
356 more localised in time, space or habitat, or alternatively if the domain of the model is larger (for  
357 example North America, Berg *et al.* 2014), may expect to see larger gains through including metadata.

358 Determining how deep learning models make decisions is complex (Goodfellow et al., 2016). Multiple  
359 interwoven contributing factors combine to produce a result, much akin to human decisions. The

360 nature of metadata means much of the gain likely comes from ruling species out rather than positively  
361 identifying them, which makes the interpretation of ‘accuracy’ metrics even more challenging. Our  
362 randomisation analysis to determine the features used by the metadata model can only be a rough  
363 guide to the basis of decisions. The randomisation process will represent the pre-existing imbalance of  
364 our dataset and will produce illogical combinations of metadata, such as hot temperatures during the  
365 winter, or coastal habitat within inland areas. Nonetheless, it does show evidence that the model  
366 operates along similar lines to expert identifiers. Where certain aspects of information are lost, this  
367 translated into inaccuracies in species for which that information is relevant. This is aligned with the  
368 results of Miao et al. (2018) who found that their image recognition tool for savanna mammals also  
369 used similar features to humans to identify species. Equally, for widespread and generalist species,  
370 metadata is not able to contribute to the accuracy. For instance, the identification of Seven-spot  
371 ladybird is essentially unchanged by the inclusion of metadata.

372 In theory, given enough records, a deep-learning model would be able to infer the information content  
373 of the cross-referenced database based only on primary metadata. For example, a neural network  
374 could learn to identify a set of location coordinates with a high likelihood of a given species, without  
375 knowing that those coordinates contained favoured habitat, simply because the species is frequently  
376 recorded at these locations in the training dataset. In this respect, the inclusion of derived metadata  
377 could be considered a feature extractor technique that interprets the primary metadata, rather than  
378 providing additional information. In practice, the level of data required to internally reconstruct  
379 sufficient mapping purely from primary metadata would be very high, particularly when the features  
380 are very high resolution (Tang et al., 2015). A core challenge for automated species identification is the  
381 long tail of species for which there are very sparse records (Van Horn et al., 2017), for which the  
382 advantage of including derived metadata is likely to be considerably larger than for frequently  
383 recorded species.

384 *Further Improvements to Model*

385 The design and training of deep learning models is an art rather than an exact science (Chollet &  
386 Allaire, 2018). There are likely to be opportunities for improvement in overall accuracy for each of our  
387 models. Our image-only accuracy levels (48.2%) were below that attained on other ecological  
388 datasets, though citizen scientists' images of ladybirds have been previously identified as posing a  
389 particular challenge for computer vision systems (Van Horn et al., 2017). For example, 67% accuracy  
390 was established as a baseline on the diverse iNaturalist image competition dataset (Van Horn et al.,  
391 2017), while competition winners were able to reach 74%.

392 Practically, incorporating metadata into neural networks need not introduce considerably more effort.  
393 Metadata is substantially simpler to process than image data and did not appear to add significantly to  
394 the training time. Compared to the very deep convolutional networks needed to interpret images,  
395 metadata can be processed with a small number of densely connected layers. Our tests with much  
396 larger or deeper networks did not lead to further gains. The number of parameters in our metadata  
397 models were several orders of magnitude smaller than the image model and could be trained in a  
398 matter of seconds per epoch. However, there are small additional design overheads in constructing a  
399 multi-input neural network compared to an image-only approach. There now exist user-friendly  
400 'automatic learning' software that can generate a computer vision model given only a set of labelled  
401 images. In contrast, currently available support for multi-input models is comparatively lacking and  
402 requires direct specification of the model architecture as well as data manipulation pipelines to  
403 combine disparate information sources. Fortunately, tools such as the *keras* R package (Allaire &  
404 Chollet, 2019) provide straightforward frameworks for multi-input models that are well within the  
405 reach of ecologists without a formal computational science background. We have also shared our code  
406 (SI) to help others make use of this methodology.

407 We have demonstrated the improvement gained through the use of metadata. Further improvements  
408 could likely be made through instigating test-time augmentation where multiple crops or rotations of  
409 an image are presented to the classifier, ensembling multiple models, and increasing the size of the

410 dataset through supplementary images and historical records (Chollet & Allaire, 2018). Our approach  
411 to augmenting metadata (adding Gaussian noise to each element) was relatively basic and more  
412 targeted approaches to generating additional synthetic training data (Chawla et al. 2002) could lead to  
413 better results.

414 The overall accuracy of a species classifier can be considerably enhanced by incorporating a prior  
415 likelihood of each species' relative frequency. Approaches that allow the model to directly learn the  
416 relative frequencies of the species could attain even higher overall accuracy. However, in contrast to  
417 improvements discussed in the previous paragraph this would significantly reduce the accuracy for  
418 rarely observed species. A model that only learnt to accurately distinguish between Harlequin and  
419 Seven-spot ladybirds (that constitute the majority of records) could attain an accuracy of 70%, but this  
420 would be of limited applied use.

421 The challenge of species identification has in the past attracted computer scientists who can view  
422 species identification as an interesting example of large real-world labelled datasets (Weinstein 2018).  
423 Open competitions such as the annual iNaturalist (Van Horn et al., 2017) and LifeCLEF competitions  
424 (Goëau, Bonnet, & Joly, 2017) have spurred considerable improvements in identification accuracy.  
425 Including metadata in these datasets (such as the PlantCLEF 2019 competition) could lead to  
426 considerable improvements. However, any release of metadata must consider the geoprivacy of  
427 citizen scientists and potential risk to endangered species. Due consideration of the appropriate  
428 resolution of location data, and the identifiability of individuals in any data publicly released is  
429 essential.

#### 430 *Transferability of models including metadata*

431 The inclusion of metadata in an automatic identification tool will influence its transferability to new  
432 contexts. With all machine learning approaches, any automatic identification process is only as good  
433 as the extent and scope of the training data used. A model that has been trained on the location of UK  
434 records would need to be retrained for use in continental Europe, whereas an image-only model could

435 be expected to be at least somewhat useful in both contexts. As such, a model trained on derived  
436 metadata such as habitat types or local weather may be more transferable than one trained on  
437 coordinates and specific dates. A focussed appreciation of the domain a model will be applied to is  
438 essential. Transferability will be critical for expanding from well-studied areas (such as UK), to  
439 understudied areas where there is great potential for citizen science to fill gaps in knowledge (Pocock  
440 et al., 2018).

441 Transferability of models can be a challenge even within a region since records generated through  
442 unstructured broad-based citizen science are distinctive from those generated by committed amateur  
443 recorders, structured citizen science projects or professional surveys (Boakes et al., 2016). Submitted  
444 records are the result of interactions between human behaviour and species ecology (Boakes et al.,  
445 2016). Highly visited sites may show an over-abundance of common species that are new to citizen  
446 scientists with relatively limited experience. In our dataset, uploaded records of ladybirds correlate  
447 strongly with the first appearance of species and news reports of invasive species (T. A. August  
448 *unpublished data*).

449 Our choice of what contextual data to include was guided by our knowledge of variables that are likely  
450 to influence ladybirds in the British Isles. For more taxonomically diverse tools, it would be beneficial  
451 to use a wider a range of derived metadata variables. This could include more diverse weather  
452 information, climate maps, and topography. We did not include species range maps (Roy, Brown,  
453 Frost, & Poland, 2011) in this study since most (>90%) records came from areas within the range of 15  
454 out of the 18 focal species considered in this study. Binary species range maps cannot account for the  
455 relative frequency of species across a region, but this can be learnt by a deep learning network  
456 provided with location data of records. Although range maps could be informative within models with  
457 a wide spatial scope or for highly localised species, they are comparatively verbose to encode for in  
458 deep learning networks. When using a model to identify large numbers of species, the intersection or  
459 otherwise of a record with each species range map may need to be encoded in a separate variable.

460 This greatly increases the length of the metadata vector associated with each record and it could  
461 become challenging for models to identify relevant information. Although deep learning networks  
462 have the potential to effectively ignore data that is not relevant, there is the potential to slow the  
463 fitting procedure if too much irrelevant information is presented. Where accurate species range map  
464 data is available (and may impart additional information beyond that contained in the training set of  
465 records), an approach that combines machine learning with a range-map based shortlist may be the  
466 most useful (Wittich et al., 2018).

## 467 **Conclusions**

468 Identification of insects poses a considerable challenge for computer vision (Martineau et al., 2017).  
469 Insect diversity is extraordinarily large – as an example, there are over 6000 ladybird species  
470 worldwide (Roy and Brown 2018), most of which do not have accessible labelled images. For difficult  
471 challenges, such as species identification in the field, the optimal solutions will involve humans and  
472 artificial intelligence working in tandem (Trouille, Lintott, & Fortson, 2019). Our results demonstrate  
473 the potential for considerable improvement in the accuracy of automatic identification when  
474 incorporating contextualisation information directly within the model. This is also likely to apply to  
475 passive acoustic monitoring tools (Gibb, Browning, Glover-Kapfer, & Jones, 2019) too. Researchers  
476 building automatic identification methods will benefit from training models to place images in context,  
477 just as a human naturalist would, to best unlock the potential of artificial intelligence in ecology.

## 478 **Acknowledgments**

479 Our thanks to Mark Logie for assistance accessing the iRecord database, Colin Harrower for species  
480 range maps, and to the UK Ladybird Survey volunteer recorders who generated the dataset the work is  
481 based upon. This work was supported by the Natural Environment Research Council award number  
482 NE/R016429/1 as part of the UK-SCAPE programme delivering National Capability. JCDT was funded  
483 for this project through a NERC Innovation placement linked to the Oxford Environmental Doctoral  
484 Training Program (NE/L002612/1).

485

486 **Authorship Statement**

487 JCDT built the models and analysed the results, based on an initial idea and design of TAA and through  
488 discussions with HER and TAA. JCDT wrote the first manuscript draft and all authors contributed  
489 critically to revisions.

490 **Data Accessibility**

491 R code used to build models and analyse results is available at  
492 [https://github.com/jcdterry/LadybirdID\\_Public](https://github.com/jcdterry/LadybirdID_Public) and summarised in SI 2. Records were accessed from  
493 the UK Biological Records Centre ([www.brc.ac.uk](http://www.brc.ac.uk)).

494 **References**

- 495 Allaire, J., & Chollet, F. (2019). keras: R Interface to 'Keras'. Retrieved from [https://cran.r-](https://cran.r-project.org/package=keras)  
496 [project.org/package=keras](https://cran.r-project.org/package=keras)
- 497 August, T., Harvey, M., Lightfoot, P., Kilbey, D., Papadopoulos, T., & Jepson, P. (2015). Emerging  
498 technologies for biological recording. *Biological Journal of the Linnean Society*, 115(3), 731–  
499 749. doi:10.1111/bij.12534
- 500 Berg, T., Liu, J., Lee, S. W., Alexander, M. L., Jacobs, D. W., & Belhumeur, P. N. (2014). Birdsnap:  
501 Large-scale fine-grained visual categorization of birds. *Proceedings of the IEEE Computer Society*  
502 *Conference on Computer Vision and Pattern Recognition*, 2019–2026.  
503 doi:10.1109/CVPR.2014.259
- 504 Boakes, E. H., Gliozzo, G., Seymour, V., Harvey, M., Smith, C., Roy, D. B., & Haklay, M. (2016).  
505 Patterns of contribution to citizen science biodiversity projects increase understanding of  
506 volunteers' recording behaviour. *Scientific Reports*, 6(1), 33051. doi:10.1038/srep33051
- 507 Buda, M., Maki, A., & Mazurowski, M. A. (2018). A systematic study of the class imbalance problem  
508 in convolutional neural networks. *Neural Networks*, 106, 249–259.



- 509           doi:10.1016/j.neunet.2018.07.011
- 510   Chollet, F., & Allaire, J. (2018). *Deep Learning in R*. Manning.
- 511   Comont, R. F., Roy, H. E., Lewis, O. T., Harrington, R., Shortall, C. R., & Purse, B. V. (2012). Using  
512           biological traits to explain ladybird distribution patterns. *Journal of Biogeography*, 39(10),  
513           1772–1781. doi:10.1111/j.1365-2699.2012.02734.x
- 514   Creed, E. R. (1966). Geographic variation in the Two-spot Ladybird in England and Wales. *Heredity*,  
515           21(1), 57–72. doi:10.1038/hdy.1966.4
- 516   Cui, Y., Song, Y., Sun, C., Howard, A., & Belongie, S. (2018). Large Scale Fine-Grained Categorization  
517           and Domain-Specific Transfer Learning. doi:10.1109/CVPR.2018.00432
- 518   Duff, A. G. (2018). *Checklist of Beetles of the British Isles* (3rd ed.). Pemberley Books, Iver.
- 519   Gardiner, M. M., Allee, L. L., Brown, P. M., Losey, J. E., Roy, H. E., & Smyth, R. R. (2012). Lessons from  
520           lady beetles: accuracy of monitoring data from US and UK citizen-science programs. *Frontiers in*  
521           *Ecology and the Environment*, 10(9), 471–476. doi:10.1890/110185
- 522   Gaston, K. J., & O'Neill, M. A. (2004). Automated species identification: Why not? *Philosophical*  
523           *Transactions of the Royal Society B: Biological Sciences*, 359(1444), 655–667.  
524           doi:10.1098/rstb.2003.1442
- 525   Gibb, R., Browning, E., Glover-Kapfer, P., & Jones, K. E. (2019). Emerging opportunities and  
526           challenges for passive acoustics in ecological assessment and monitoring. *Methods in Ecology*  
527           *and Evolution*, 10(2), 169–185. doi:10.1111/2041-210X.13101
- 528   Goëau, H., Bonnet, P., & Joly, A. (2017). Plant identification based on noisy web data : the amazing  
529           performance of deep learning. In C. Linda, F. Nicola, G. Lorraine, & M. Thomas (Eds.), *CEUR*  
530           *Workshop Proceedings*. Retrieved from <http://ceur-ws.org/Vol-1886/>
- 531   Goodfellow, I., Bengio, Y., & Courville, A. (2016). *Deep Learning*. MIT Press.

- 532 IPBES. (2019). *Global assessment report on biodiversity and ecosystem services of the*  
533 *Intergovernmental Science-Policy Platform on Biodiversity and Ecosystem Services*. (E. S.  
534 Brondizio, J. Settele, S. Díaz, & H. T. Ngo, Eds.). Bonn, Germany: IPBES Secretariat.
- 535 Jouveau, S., Delaunay, M., Vignes-Lebbe, R., & Nattier, R. (2018). A multi-access identification key  
536 based on colour patterns in ladybirds (Coleoptera, Coccinellidae). *ZooKeys*, 758, 55–73.  
537 doi:10.3897/zookeys.758.22171
- 538 Kingma, D. P., & Ba, J. (2014). Adam: A Method for Stochastic Optimization. *ArXiv Preprint*, 1–15.  
539 Retrieved from <http://arxiv.org/abs/1412.6980>
- 540 Laina, I., Rupprecht, C., Belagiannis, V., Tombari, F., & Navab, N. (2016). Deeper depth prediction  
541 with fully convolutional residual networks. *Proceedings - 2016 4th International Conference on*  
542 *3D Vision, 3DV 2016*, 239–248. doi:10.1109/3DV.2016.32
- 543 Mac Aodha, O., Cole, E., & Perona, P. (2019). Presence-Only Geographical Priors for Fine-Grained  
544 Image Classification. Retrieved from <http://arxiv.org/abs/1906.05272>
- 545 Marques, A. C. R., Raimundo, M. M., Cavalheiro, E. M. B., Salles, L. F. P., Lyra, C., & Von Zuben, F. J.  
546 (2018). Ant genera identification using an ensemble of convolutional neural networks. *PLoS*  
547 *ONE*, 13(1), 1–13. doi:10.1371/journal.pone.0192011
- 548 Martineau, M., Conte, D., Raveaux, R., Arnault, I., Munier, D., & Venturini, G. (2017). A survey on  
549 image-based insect classification. *Pattern Recognition*, 65, 273–284.  
550 doi:10.1016/j.patcog.2016.12.020
- 551 Met Office, . (2012). Met Office Integrated Data Archive System (MIDAS) Land and Marine Surface  
552 Stations Data (1853-current). NCAS British Atmospheric Data Centre 2019. Retrieved from  
553 <http://catalogue.ceda.ac.uk/uuid/220a65615218d5c9cc9e4785a3234bd0>
- 554 Miao, Z., Gaynor, K. M., Wang, J., Liu, Z., Muellerklein, O., Norouzzadeh, M. S., ... Getz, W. M. (2018).  
555 A comparison of visual features used by humans and machines to classify wildlife. *BioRxiv*,

- 556 450189. doi:10.1101/450189
- 557 Pocock, M. J. O., Chandler, M., Bonney, R., Thornhill, I., Albin, A., August, T., ... Danielsen, F. (2018). A  
558 Vision for Global Biodiversity Monitoring With Citizen Science (pp. 169–223).  
559 doi:10.1016/bs.aecr.2018.06.003
- 560 Pocock, M. J. O., Roy, H. E., Preston, C. D., & Roy, D. B. (2015). The Biological Records Centre: A  
561 pioneer of citizen science. *Biological Journal of the Linnean Society*, *115*(3), 475–493.  
562 doi:10.1111/bij.12548
- 563 Rowland, C. S. ., Morton, R. D. ., Carrasco, L. ., McShane, G. ., O’Neil, A. W. ., & Wood, C. M. (2017).  
564 Land Cover Map 2015 (1km percentage target class, GB). NERC Environmental Information  
565 Data Centre. doi:10.5285/505d1e0c-ab60-4a60-b448-68c5bbae403e
- 566 Roy, H. E., & Brown, P. (2018). *Field Guide to the Ladybirds of Great Britain and Ireland*. Bloomsbury.
- 567 Roy, H. E., Brown, P. M. ., Frost, R., & Poland, R. L. (2011). *Ladybirds (Coccinellidae) of Britain and*  
568 *Ireland*. Shrewsbury: Field Studies Council.
- 569 Roy, H. E., Brown, P. M. J., Adriaens, T., Berkvens, N., Borges, I., Clusella-Trullas, S., ... Zhao, Z. (2016).  
570 The harlequin ladybird, *Harmonia axyridis*: global perspectives on invasion history and ecology.  
571 *Biological Invasions*, *18*(4), 997–1044. doi:10.1007/s10530-016-1077-6
- 572 Rzanny, M., Seeland, M., Wäldchen, J., & Mäder, P. (2017). Acquiring and preprocessing leaf images  
573 for automated plant identification: Understanding the tradeoff between effort and information  
574 gain. *Plant Methods*, *13*(1), 1–11. doi:10.1186/s13007-017-0245-8
- 575 Silvertown, J. (2009). A new dawn for citizen science. *Trends in Ecology and Evolution*, *24*(9), 467–  
576 471. doi:10.1016/j.tree.2009.03.017
- 577 Swanson, A., Kosmala, M., Lintott, C., Simpson, R., Smith, A., & Packer, C. (2015). Snapshot Serengeti,  
578 high-frequency annotated camera trap images of 40 mammalian species in an African savanna.

- 579 *Scientific Data*, 2, 150026. doi:10.1038/sdata.2015.26
- 580 Szegedy, C., Ioffe, S., Vanhoucke, V., & Alemi, A. (2016). Inception-v4, Inception-ResNet and the  
581 Impact of Residual Connections on Learning. *ArXiv*. doi:10.1016/j.patrec.2014.01.008
- 582 Tang, K., Paluri, M., Fei-Fei, L., Fergus, R., & Bourdev, L. (2015). Improving image classification with  
583 location context. *Proceedings of the IEEE International Conference on Computer Vision, 2015*  
584 *Inter*, 1008–1016. doi:10.1109/ICCV.2015.121
- 585 Torney, C. J., Lloyd-Jones, D. J., Chevallier, M., Moyer, D. C., Maliti, H. T., Mwita, M., ... Hopcraft, G. C.  
586 (2019). A comparison of deep learning and citizen science techniques for counting wildlife in  
587 aerial survey images. *Methods in Ecology and Evolution*, 10(6), 779–787. doi:10.1111/2041-  
588 210X.13165
- 589 Trouille, L., Lintott, C. J., & Fortson, L. F. (2019). Citizen science frontiers: Efficiency, engagement,  
590 and serendipitous discovery with human–machine systems. *Proceedings of the National*  
591 *Academy of Sciences*, 116(6), 1902–1909. doi:10.1073/pnas.1807190116
- 592 Van Horn, G., Mac Aodha, O., Song, Y., Cui, Y., Sun, C., Shepard, A., ... Belongie, S. (2017). The  
593 iNaturalist Species Classification and Detection Dataset. *ArXiv*. Retrieved from  
594 <http://arxiv.org/abs/1707.06642>
- 595 Wäldchen, J., & Mäder, P. (2018). Machine learning for image based species identification. *Methods*  
596 *in Ecology and Evolution*, 9(11), 2216–2225. doi:10.1111/2041-210X.13075
- 597 Weinstein, B. G. (2018). A computer vision for animal ecology. *Journal of Animal Ecology*, 87(3), 533–  
598 545. doi:10.1111/1365-2656.12780
- 599 Willi, M., Pitman, R. T., Cardoso, A. W., Locke, C., Swanson, A., Boyer, A., ... Fortson, L. (2019).  
600 Identifying animal species in camera trap images using deep learning and citizen science.  
601 *Methods in Ecology and Evolution*, 10(1), 80–91. doi:10.1111/2041-210X.13099

602 Wittich, H. C., Seeland, M., Wäldchen, J., Rzanny, M., & Mäder, P. (2018). Recommending plant taxa

603 for supporting on-site species identification. *BMC Bioinformatics*, 19(1), 1–17.

604 doi:10.1186/s12859-018-2201-7

605
